# Supplementary material for: Closing the supply-side gap: using a novel vulnerability index to identify the right policy mix for coal producing countries
Source: Springer Nature journal article supplement (doi:10.1007/s00550-024-00530-4), 2024-04-03
Supplement: MOESM1 [file 26940236]

## Sheet: National
Indicator	row count	GDP per capita (current US$)	Exports of goods and services (million current US$)	Coal exports (million ton)	Coal exports (million current USD)	Coal rents as % GDP	Coal as % Exports	Coal as share electricity mix	Coal as % electricity mix	Capacity weigthed age of coal mines	expected decline in production COALMOD world in 2040 compared to 2020 (as percentage) - Scenario STEPS (sanctions)	expected decline in production COALMOD world in 2040 compared to 2020 - Scenario STEPS (no sanctions)	expected decline in production COALMOD world in 2040 compared to 2020 - Scenario APS (sanctions)	expected decline in production COALMOD world in 2040 compared to 2020 - Scenario APS (no sanctions)	Average share of coal in GDP of coal producing regions (weigthed per production share)	Production to reserves rate	Index of economic complexity	Remotedness of coal regions (weigthed per production share)	National coal phase-down plans or JETPs	HDI	Sovereign Debt Score	Average regional Development Gap
Source	2	WDI	WDI	World Bank WITS and IEA Coal 2021 when yellow	World Bank WITS	WDI	Calculated	WDI	EMBER	GCMT 2022	COALMOD	COALMOD	COALMOD	COALMOD	Calculated	BP Statistical Review	Harvard ECI	Calculated	national sources	UNDP	Moodys	UNDP
Year	3	2019	2019	2019	2019	2019	2019	2015	2019	2019	compared to 2019	compared to 2019	compared to 2019			2019	2019		Binary: 1= no, 0 =yes	2019	2019	2019
AUS	4	54941.4	336431	396.059	44236.6	0.658377	0.131488	62.8716	56.63	29.1786	-0.226833	-0.226833	-0.605643	-0.618676	0.0952542	294.199	-0.479483	0.206596	1	0.941	27	-0.00340833
CHN	5	10143.8	2.62894e+06	3.98665	918.497	0.427944	0.00034938	70.3094	65.04	18.625	-0.324525	-0.324525	-0.50281	-0.503112	0.109105	36.8162	1.3612	0.166323	1	0.762	21	-0.00227737
COL	6	6438.06	51271.1	71.5485	4883.99	0.543751	0.0952581	11.8522	7.87	24.6667	-0.243955	-0.243955	-0.486893	-0.491375	0.415282	55.267	0.062157	0.748148	1	0.768	17	-0.0494028
IDN	8	4151.23	206431	456.375	21728.1	0.739067	0.105256	55.7765	62.58	12.6832	0.337563	0.337563	0.0821304	0.0800732	0.345329	65.3951	-0.004408	0.839354	1	0.716	17	0.00663212
IND	9	2047.23	529016	0.871567	90.7412	0.816505	0.000171528	75.3094	73.87	26.9109	-0.120738	-0.120738	-0.351166	-0.354251	0.0618348	140.038	0.433709	0.245185	1	0.645	17	0.00454913
KAZ	10	9812.6	66197.7	25.3029	486.471	0.792582	0.00734876	71.5689	69.61	49.4167	0.00486571	0.00486571	-0.135783	-0.133137	0.0853683	221.804	-0.357733	0.25838	1	0.819	16	0.00933742
POL	11	15699.9	330869	4.5178	625.639	0.203689	0.0018909	80.9062	72.46	70.4	-0.822274	-0.822274	-0.828309	-0.828309	0.0416819	239.589	1.07522	0.447765	0	0.881	20	0.00206407
RUS	12	11536.3	481537	193.056	16491.1	0.400349	0.0342469	14.8217	15.78	36.2326	-0.192958	-0.192958	-0.399101	-0.410234	0.330554	369.23	0.095137	0.233952	1	0.845	16	-0.00518925
USA	13	65120.4	2519727	94.2785	9827.9	0.138485	0.00390038	34.2327	23.22	31.975	-0.710399	-0.710399	-0.753072	-0.752899	0.10816	390.024	1.57608	0.170723	1	0.93	27	-0.00420774
ZAF	15	6688.79	106070	79	4717.54	1.86017	0.0444759	92.7112	88.03	22.4815	-0.361423	-0.361423	-0.701311	-0.702928	0.2	38.8988	0.009188	0.232568	0	0.736	16	-0.036

## Sheet: Regional
Regions that concentrate more than 70% of coal production		Share coal Prod Region 1	Share coal Prod Region 2	Share coal Prod Region 3	Share coal Prod Region 4	Share coal Prod Region 5	Total prod selected regions	Share mining GDP Region 1	Share mining GDP Region 2	Share mining GDP Region 3	Share mining GDP Region 4	Share mining GDP Region 5	Average GDP contribution main regions	Weighted average GDP contribution main regions	Remotedness Region 1	Remotedness Region 2	Remotedness Region 3	Remotedness Region 4	Remotedness Region 5	Average remotedness main regions	WeightedAverage remotedness main regions	Regional HDI Gap	Regional HDI Gap	Regional HDI Gap	Regional HDI Gap	Regional HDI Gap	Average HDI regions	Weighted average HDI regions
AUS	1. Queensland (QLD) / 2. New South Wales (NSW)	0.497289	0.405164				0.902453	0.144917	0.0342997				0.0896082	0.0952542	0	0				0	0	-0.007	0.001				-0.003	-0.00340833
CHN	1. Inner Mongolia / 2. Shanxi / 3. Shaanxi / 4. Xinjiang	0.276393	0.259268	0.169302	0.0634712		0.768434	0.137252	0.130652	0.0561035	0.0398992		0.0909766	0.109105	0	0.220894	0.518482	0		0.184844	0.104146	0.009	-0.009	0	-0.03		-0.0075	-0.00227737
COL	1. El Cesar (CSR) / 2. La Guajira (GJR)	0.612652	0.30915				0.921802	0.420874	0.404201				0.412537	0.415282	0	0				0	0	-0.038	-0.072				-0.055	-0.0494028
IDN	1. East Kalimantan / 2. South Kalimantan	0.480703	0.3415				0.822203	0.455231	0.19063				0.32293	0.345329	0	0				0	0	0.022	-0.015				0.0035	0.00663212
IND	1. CHHATTISGARH / 2. ODISHA / 3. MADHYA PRADESH / 4. JHARKHAND / 5. TELANGANA	0.220894	0.20027	0.176058	0.184512	0.0920061	0.873741	0.073052	0.0832825	0.0269957	0.0734325	0.0316266	0.0576779	0.0618348	0	0	0.81	0	0.478152	0.25763	0.31888	0.114	-0.037	-0.038	-0.045	0.013	0.0014	0.00454913
KAZ	1. Pavlodar / 2. Кaragandy	0.600257	0.300918				0.901175	0.0728471	0.110345				0.0915961	0.0853683	0	0.480703				0.240351	0	0.007	0.014				0.0105	0.00933742
POL	1. Silesia / 2. Lodz	0.518482	0.362283				0.880765	0.0618169	0.0128657				0.0373413	0.0416819	0	0.497289				0.248645	0	0.007	-0.005				0.001	0.00206407
RUS	1. Kemerovo Oblast / 2. Krasnoyarsk Krai / 3. Khakassia / 4. Sakha Republic (Yakutia) /5.Novosibirsk Oblast	0.478152	0.0888246	0.0650546	0.0450378	0.0302754	0.707344	0.367351	0.256368	0.168606	0.515359	0.0401159	0.245112	0.330554	0	0	0	0	0	0	0	-0.017	0.028	-0.006	0.041	0.017	0.0126	-0.00518925
USA	1. Wyoming / 2. West Virginia / 3. Pennsylvania / 4. Illinois /5. Kentucky	0.392328	0.132158	0.0709143	0.0649643	0.0510128	0.711377	0.156708	0.105724	0.0128769	0.00201819	0.00872851	0.0572111	0.10816	0	0.600257	0.392328	Share coal Prod Region 1	0.276393	0.317244	0.130436	0.011	-0.045	0.001	0.007	-0.037	-0.0126	-0.00420774
ZAF	1. Mpumalanga	0.81					0.81	0.2					0.2	0.2	0					0	0	-0.036					-0.036	-0.036
